# Supplementary material for: Efficient in vivo gene expression by trans-splicing adeno-associated viral vectors
Source: Springer Nature journal article supplement (doi:10.1038/nbt1153), 2005-10-09
Supplement: 41587_2005_BFnbt1153_MOESM1_ESM.pdf [file 41587_2005_BFnbt1153_MOESM1_ESM.pdf]

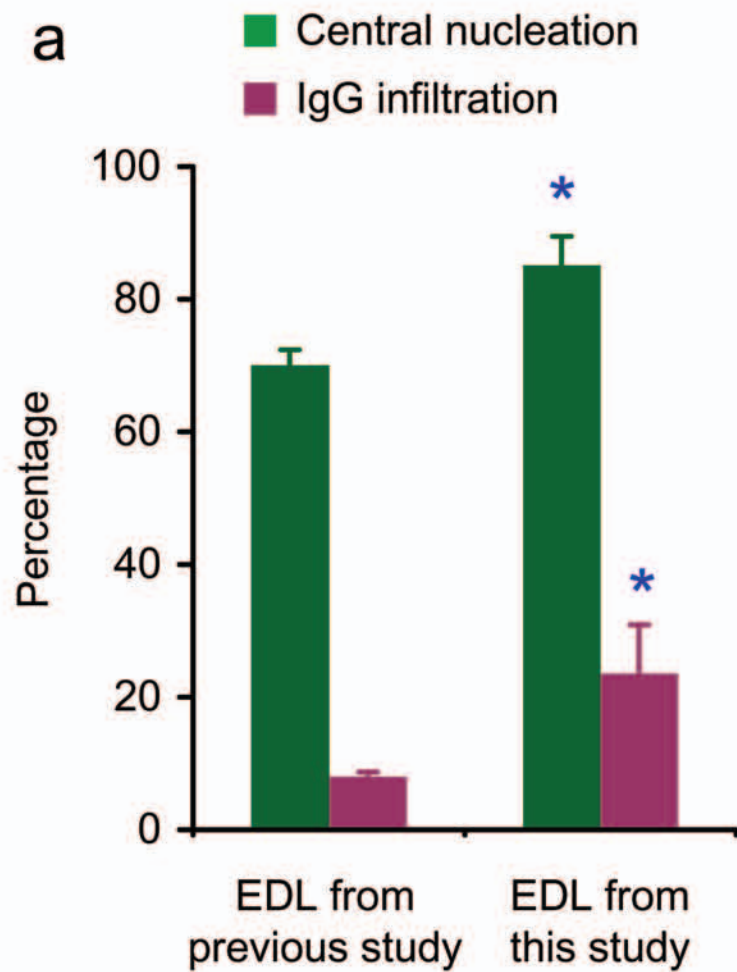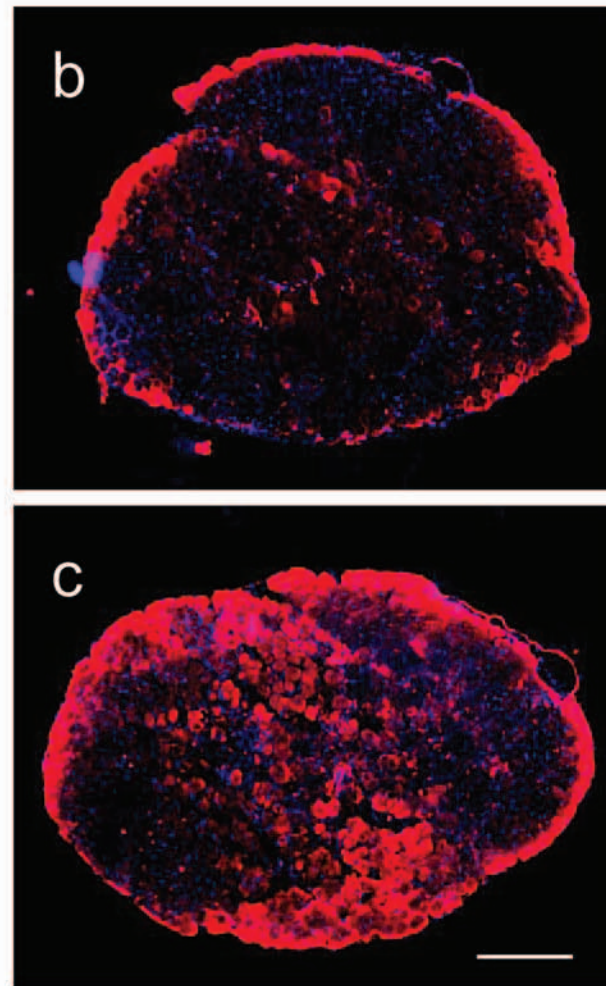

**Supplementary Figure 1. Adult *mdx* mice used in this study displayed more severe muscle**

**pathology.** To determine whether the difference in muscle pathology has contributed to the difference in force measurement between the current study and a previous study, we compared the percentages of centrally nucleated myofibers and immunoglobulin (IgG) infiltration in two studies, respectively. **a,** Bar graph showing quantification results. Data are expressed at means  $\pm$  sem. For central nucleation,  $n = 5$  and  $7$  for the previous and the current studies respectively. For IgG infiltration,  $n = 5$  and  $4$  for the previous and the current studies respectively. Asterisk, the result from current study is significantly different from those of previous study (two tail, unpaired t test,  $P < 0.05$ ). **b,** A representative immunostaining photomicrograph from an EDL muscle of the previous study. **c,** A representative immunostaining photomicrograph from an EDL muscle of the current study. In panels b and c, staining was performed with a Texas-red conjugated anti-mouse IgG antibody. Nuclei were stained with DAPI. Scale bar,  $400 \mu\text{m}$ .
