# Supplementary material for: Efficient in vivo gene expression by trans-splicing adeno-associated viral vectors
Source: Springer Nature journal article supplement (doi:10.1038/nbt1153), 2005-10-09
Supplement: 41587_2005_BFnbt1153_MOESM3_ESM.pdf [file 41587_2005_BFnbt1153_MOESM3_ESM.pdf]

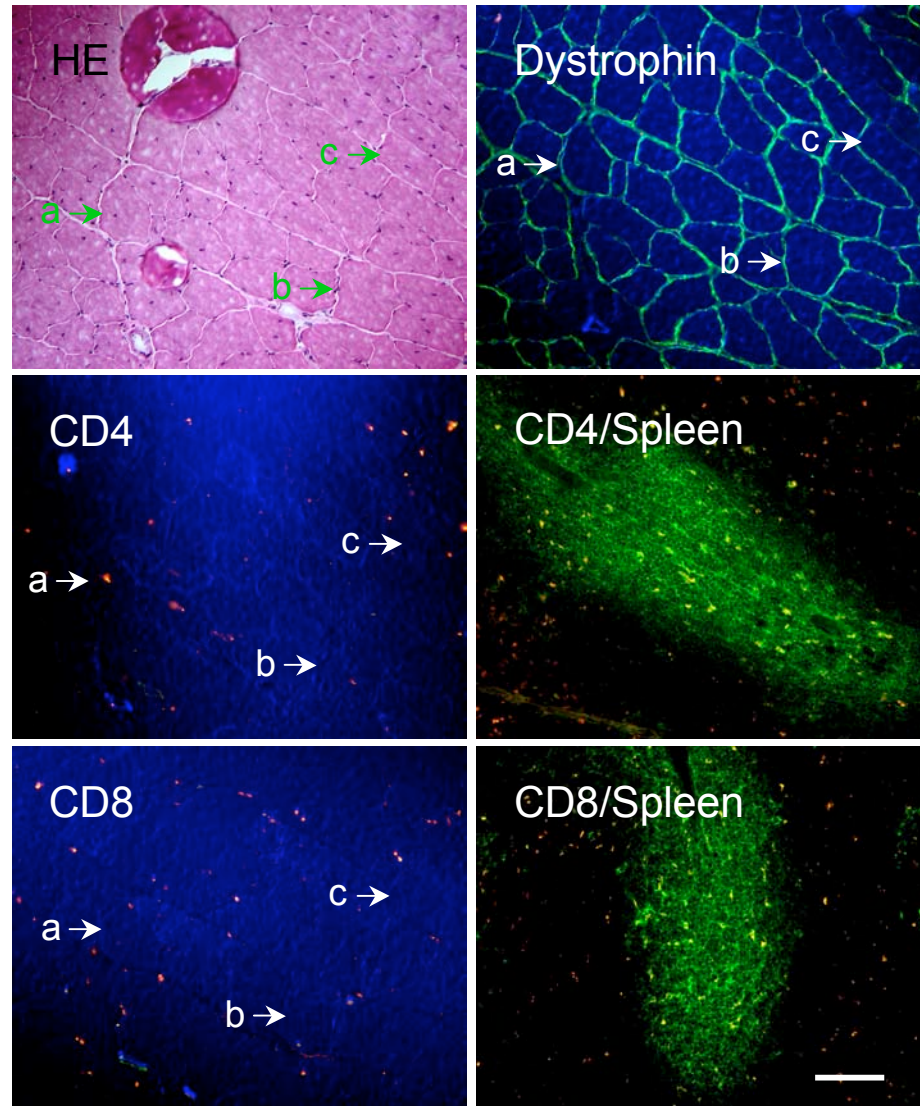

**Supplementary Figure 3. Absence of CD4+ and CD8+ T cells in AV.Donor.60 and**

**AV.Acceptor.60 co-infected muscle.** To determine whether *trans*-splicing vector co-infection could elicit cellular immune response, we examined muscle tissue at four weeks post gene transfer. Serial cryosections of co-infected TA muscle were stained with HE, polyclonal anti-dystrophin N-terminal antibody (1:600), FITC-conjugated monoclonal anti-CD4+ cell (1:500) and anti-CD8+ cell (1:200) antibodies (BD Pharmingen, San Diego, California), respectively. Representative photomicrographs are depicted here. The background images in immunostaining photomicrographs are the Normski pictures taken from the same field. Anti-CD4 and anti-CD8 immunostaining was also performed on the mouse spleen cryosections as positive controls. a, a dystrophin positive fiber with a centrally located nucleus. b, a dystrophin positive fiber with a peripherally located nucleus. c, a dystrophin negative fiber with a centrally located nucleus. Scale bar, 100  $\mu$ m.
